# Supplementary material for: Socio-demographic determinants of the knowledge and attitude of Nepalese healthcare workers toward human monkeypox: a cross-sectional study
Source: Frontiers journal article supplement (doi:10.3389/fpubh.2023.1161234), 2023-05-24
Supplement: Data_Sheet_1.PDF [file Data_Sheet_1.PDF]

## Supplementary material

### Questionnaire

#### Socio-demographic Characteristics of Health Care Workers

1. Age: \_\_\_\_\_
2. Gender
  - Male ☐
  - Female ☐
3. Profession
  - Doctor ☐
  - Nurse ☐
  - Laboratory personnel ☐
  - Radio technologist ☐
  - Epidemiologist ☐
  - Pharmacist ☐
  - Optometrist ☐
  - Others: please specify.....
4. Medical practice experience in years.....
5. Information about human monkey pox during medical education
  - Yes ☐
  - No ☐
6. Heard about human monkey pox before
  - Yes ☐
  - No ☐
7. When was the first time you heard information about monkey pox
  - I did not hear about it ☐
  - Within several days or weeks ago ☐
  - Within the last month or later ☐
  - ☐

#### • **Knowledge Questions**

1. Is monkey pox prevalent in Western countries?
  - Yes
  - No
2. Is monkey pox prevalent in South East Asian countries?
  - Yes
  - No
3. There are many human monkey pox cases in Nepal?
  - Yes
  - No
4. Is monkey pox a viral disease infection?
  - Yes

- No
- 5. Is monkey pox a bacterial disease infection?
  - Yes
  - No
- 6. Is monkey pox easily transmitted human-to-human?
  - Yes
  - No
- 7. Could monkey pox be transmitted through a bite of an infected monkey?
  - Yes
  - No
- 8. Travelers' from America and Europe are the primary source of imported cases of monkey pox?
  - Yes
  - No
- 9. Do monkey pox and smallpox have similar signs and symptoms?
  - Yes
  - No
- 10. Do monkey pox and chickenpox have similar signs and symptoms?
  - Yes
  - No
- 11. A flu-like syndrome is one of the early signs or symptoms of human monkey pox?
  - Yes
  - No
- 12. Rashes on the skin are one of the signs or symptoms of human monkey pox?
  - Yes
  - No
- 13. Papules on the skin are one of the signs or symptoms of human monkey pox?
  - Yes
  - No
- 14. Vesicles on the skin are one of the signs or symptoms of human monkey pox?
  - Yes
  - No
- 15. Pustules on the skin are one of the signs or symptoms of human monkey pox?
  - Yes
  - No
- 16. Is diarrhea one of the signs or symptoms of human monkey pox?
  - Yes
  - No
- 17. Lymphadenopathy (swollen lymph nodes) is one clinical sign or symptom that could be used to differentiate between monkey pox and smallpox cases?
  - Yes
  - No

18. One management option for symptomatic monkey pox patients is to use paracetamol?
- Yes
  - No
19. Are antivirals required in the management of human monkey pox patients?
- Yes
  - No
20. Are antibiotics required in the management of human monkey pox patients?
- Yes
  - No
21. People who got the chickenpox vaccine are immunized against monkey pox?
- Yes
  - No
22. There is a specific vaccine for monkey pox?
- Yes
  - No
23. There is a specific treatment for monkey pox?
- Yes
  - No

### **Attitude questions**

1. I am confident that the world's population can control monkey pox worldwide.
- Strongly agree, Agree, Strongly disagree, Disagree, Neutral
2. I am confident that in Nepal the local population can control monkey pox locally.
- Strongly agree, Agree, Strongly disagree, Disagree, Neutral
3. I think that there are currently enough prevention and control measures for monkey pox.
- Strongly agree, Agree, Strongly disagree, Disagree, Neutral
4. I have bad feelings toward the monkey pox virus that it might become a worldwide pandemic.
- Strongly agree, Agree, Strongly disagree, Disagree, Neutral
5. I think that monkey pox can add a new burden on the healthcare system of the affected countries.
- Strongly agree, Agree, Strongly disagree, Disagree, Neutral
6. I think monkey pox can be transmitted in Nepal.
- Strongly agree, Agree, Strongly disagree, Disagree, Neutral

7. I think that mass media coverage of monkey pox may influence its worldwide prevention.
  - Strongly agree, Agree, Strongly disagree, Disagree, Neutral
8. I am interested in learning more about monkey pox.
  - Strongly agree, Agree, Strongly disagree, Disagree, Neutral
9. I am interested to learn more about the epidemiology of the new emerging diseases.
  - Strongly agree, Agree, Strongly disagree, Disagree, Neutral
10. I am interested in learning more about Travel Medicine.
  - Strongly agree, Agree, Strongly disagree, Disagree, Neutral
11. I think that it is dangerous to travel to countries with monkey pox epidemic.
  - Strongly agree, Agree, Strongly disagree, Disagree, Neutral
